# Supplementary material for: A Self-Powered and Highly Accurate Vibration Sensor Based on Bouncing-Ball Triboelectric Nanogenerator for Intelligent Ship Machinery Monitoring
Source: MDPI journal article supplement (doi:10.3390/mi12020218), 2021-02-21
Supplement: s1 [file s1]

# A Self-powered and Highly Accurate Vibration Sensor Based on Bouncing Ball Triboelectric Nanogenerator for Intelligent Ship Machinery Monitoring

Taili Du, Xusheng Zuo, Fangyang Dong, Shunqi Li, Anaëli Elibariki Mtui, Yongjiu Zou, Peng Zhang, Junhao Zhao, Yuewen Zhang, Peiting Sun and Minyi Xu

**Table S1.** Working Frequency of different key equipment on different types of ships

| No. | Ship Type                | Equipment           | Equipment type | Power (kW) | Number of cylinders | Revolution Speed (rpm) | Working Frequency (Hz) |
|-----|--------------------------|---------------------|----------------|------------|---------------------|------------------------|------------------------|
| 1   | Container ship           | Main engine         | 12K98ME-C      | 72240      | 12                  | 104                    | 20.8                   |
|     | 14000TEU <sup>1</sup>    | Generator set       | 8L32/40        | 4000       | 8                   | 720                    | 48                     |
|     | LOA <sup>2</sup> : 366 m | Air compressor      | WP 271L        | 52         | 3 stage             | 1780                   | 29.67 / cylinder       |
|     | W <sup>3</sup> : 51.2 m  | Emergency generator | NTA855DMGE     | 300        | 6                   | 1800                   | 90                     |
|     | H <sup>4</sup> : 29.9 m  | Refrigeration unit  | CRKC           | 6.3        | 2                   | 1250                   | 41.67                  |
| 2   | Bulk Carrier             | Main engine         | 6S50MC-C       | 9480       | 6                   | 127                    | 12.7                   |
|     | 57,000 dwt <sup>5</sup>  | Generator set       | DK520E         | 420        | 5                   | 900                    | 37.5                   |
|     | LOA: 182.98 m            | Air compressor      | H-74           | 30         | 2 stage             | 1200                   | 20 / stage             |
|     | W: 32.26 m               | Emergency generator | D0226MTE       | 98         | 6                   | 1800                   | 90                     |
|     | H: 17.15 m               | Refrigeration unit  | FX-4           | 5.5        | 4 (2 set)           | 920                    | 15.33                  |
| 3   | General Cargo Ship       | Main engine         | 6RT-flex58T-D  | 10850      | 6                   | 105                    | 10.5                   |
|     | 30,000 dwt               | Generator set       | 1050W6L20      | 1260       | 6                   | 900                    | 45                     |
|     | LOA: 199.80 m            | Air compressor      | XW-150         | 31         | 2 stage             | 1775                   | 29.6 / cylinder        |
|     | W: 27.80 m               | Emergency generator | TBD234V6       | 244        | 6                   | 1800                   | 90                     |
|     | H: 15.50 m               | Refrigeration unit  | 4G.2Y          | 21.3       | 4 (2 set)           | 1750                   | 29.17                  |
| 4   | Training Ship            | Main engine         | 6S35MC Mk7     | 4440       | 6                   | 173                    | 28.83                  |
|     | 6600 GT <sup>6</sup>     | Generator set       | 520W4L20       | 545        | 4                   | 1000                   | 33.33                  |
|     | LOA: 116.00 m            | Air compressor      | HV2/200        | 22         | 2 stage             | 725                    | 12.08 / cylinder       |
|     | W: 18.00 m               | Emergency generator | TBD234V8       | 249        | 8                   | 1500                   | 100                    |
|     | H: 8.35 m                | Refrigeration unit  | 4H.2Y          | 15.6       | 4 (2 set)           | 1450                   | 24.17                  |
| 5   | Tug                      | Main engine         | 6MG28HZ        | 1838       | 6                   | 750                    | 37.5                   |
|     | 2850 GT                  | Generator set       | KMTA           | 403        | 6                   | 1000                   | 50                     |
|     | LOA: 59.20 m             | Air compressor      | 2ZS-0.34/3-BS  | 5          | 2 stage             | 600                    | 10 / cylinder          |
|     | W: 14.00 m               | Emergency generator | /              | /          | /                   | /                      | /                      |
|     | H: 6.00 m                | Refrigeration unit  | 2CC-3.2Y-40S   | 2.65       | 2                   | 1450                   | 48.33                  |

<sup>1</sup> TEU means twenty-foot equivalent unit;

<sup>2</sup> LOA means Length overall, overall length of the ship;

<sup>3</sup> W means the breadth moulded, maximum breadth of the ship measured inside the inner shell strakes of plating, and usually occurs amidships;

<sup>4</sup> H means the depth moulded, vertical distance between the moulded base line and the top of the beams of the uppermost continuous deck measured at the side amidships of the ship;

<sup>5</sup> dwt means deadweight tonnage, a measure of how much weight a ship can carry;

<sup>6</sup> GT means gross tonnage, calculated based on "the moulded volume of all enclosed spaces of the ship".

There are 5 different types of ships are listed in Table S2 including container ship, bulk carrier, general cargo ship, training ship and special purpose ship. The key equipment including main engine, generator set, air compressor, emergency generator and refrigeration unit made by different mainstream manufactures are also indicated in Table S2. It can be seen from Table S2 that the vibration frequency of most key equipment is from 10 Hz to 50 Hz except the emergency generator. It should be noted that the emergency generator is only operated for short time in event of emergency situations rather than long period continuous running as other key equipment, so it is unnecessary to keep continuous monitoring of it. In addition, the vibration frequency can be easily calculated through

$$f_e = \frac{n \cdot r}{60},$$

where,  $f_e$  is the vibration frequency of the equipment,  $n$  is the number of the cylinder, and  $r$  is the revolution speed. However, the generator set are most four stroke diesel engine, which means each cylinder works one time every two revolutions. Moreover, the main engine on some small ships such as the No.5 (Tug) is also four stroke diesel engine. So, the vibration frequency of the generator set should be calculated by

$$f_e = \frac{n \cdot r}{60 \times 2}.$$

In addition, in order to compress the air to about 30MPa for starting the main engine, the compression process of an air compressor generally has 2 or 3 stages. Different stage has different working characteristics, so the vibration frequency should be monitored separately.

**Table S2.** Working parameters of the vibration exciter

| Model                           | JZK-10    |
|---------------------------------|-----------|
| Maximum vibration force (N)     | 100       |
| Maximum amplitude (mm)          | $\pm 10$  |
| Maximum input current (Arms)    | $\leq 10$ |
| Maximum acceleration (g)        | 10        |
| Frequency range (Hz)            | DC-2K     |
| DC coil resistance ( $\Omega$ ) | 0.7       |
| Force constant                  | 10        |
| Effective moving mass(Kg)       | 0.35      |
| Output type                     | Mandril   |

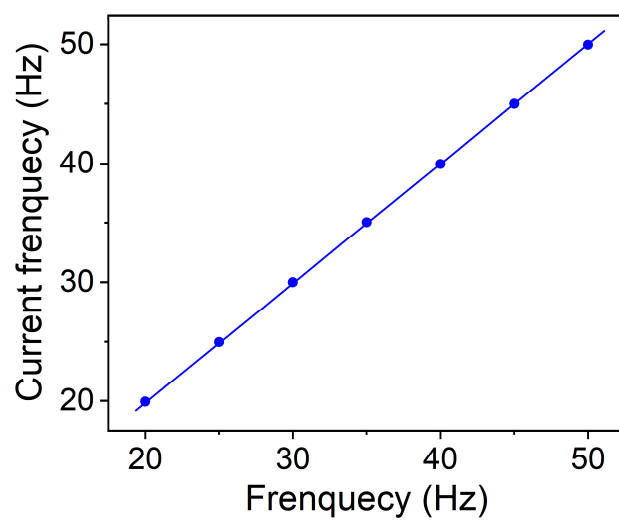

**Figure S1.** The consistency between the vibration frequency and the FFT result of short-circuit current signal

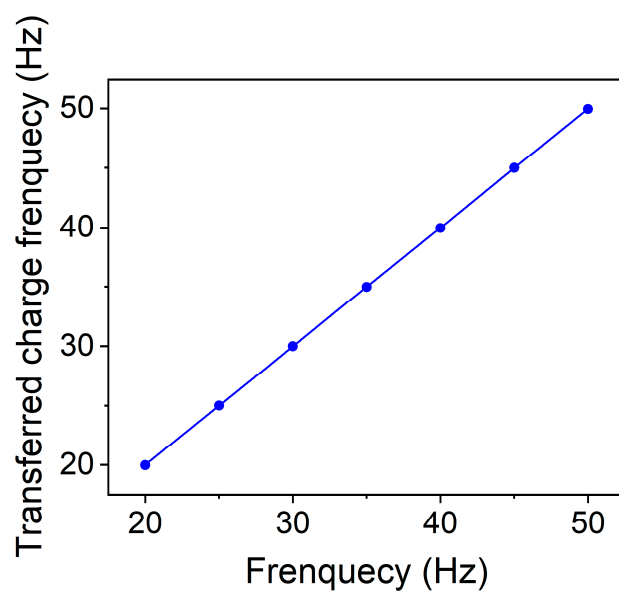

**Figure S2.** The consistency between the vibration frequency and the FFT result of transferred charge signal

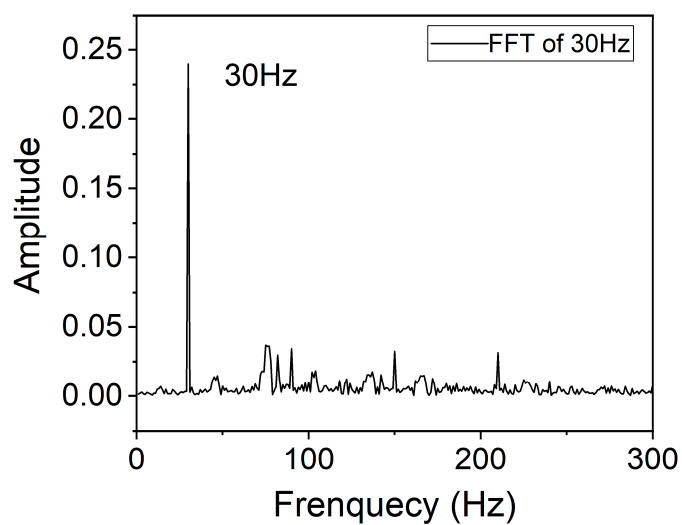

**Figure S3.** The FFT of the short-circuit current signal of the BB-TENG sensor with vibration frequency of 30Hz

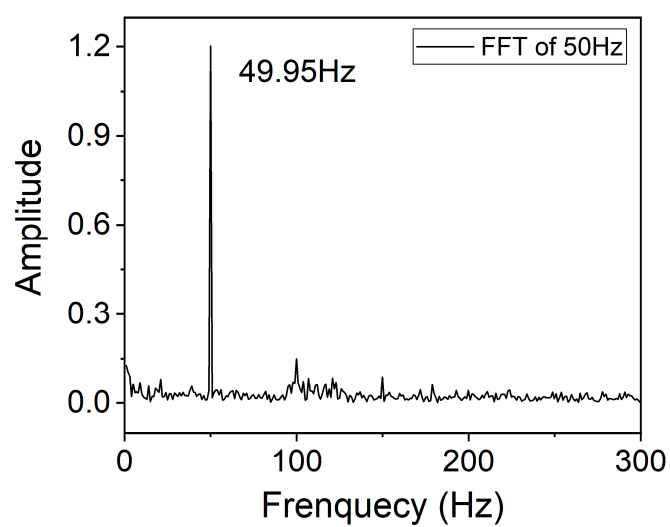

**Figure S4.** The FFT of the transferred charge signal of the BB-TENG sensor with vibration frequency of 50Hz

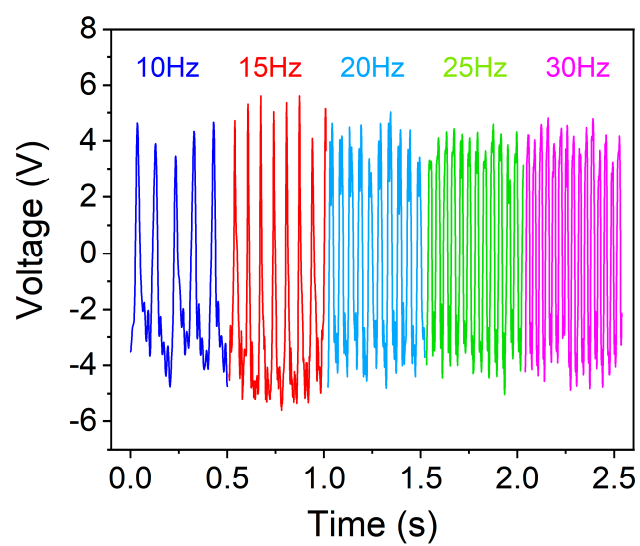

**Figure S5.** Open-circuit voltage of BB-TENG sensor at different frequencies with a fixed vibration amplitude of 5mm

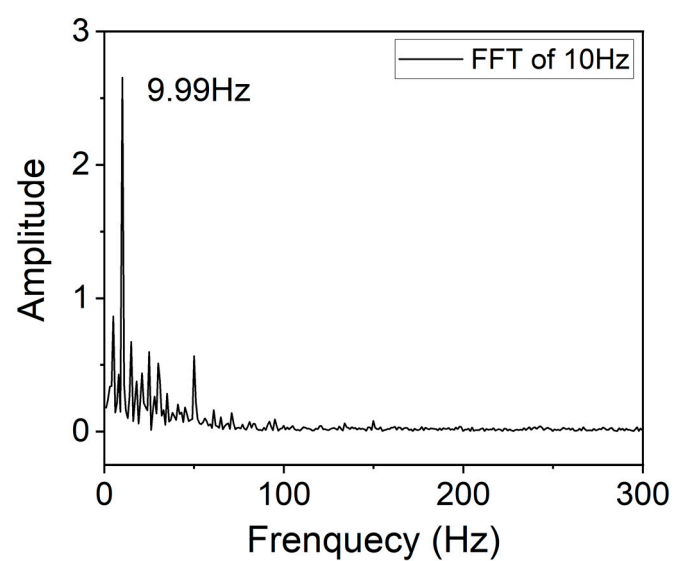

**Figure S6** The FFT of open-circuit voltage signal of BB-TENG sensor with vibration frequency of 10 Hz

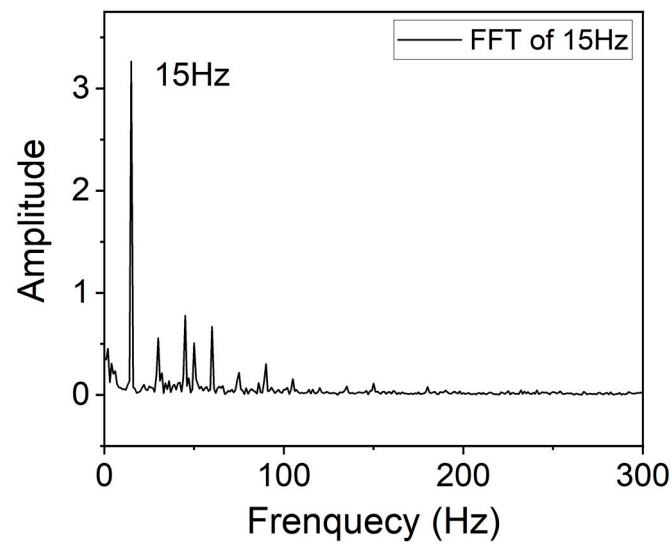

**Figure S7** The FFT of open-circuit voltage signal of BB-TENG sensor with vibration frequency of 15 Hz

**Supplementary Video S1:** PTFE ball bouncing status with  $f=25$  Hz,  $A=0.5$  mm,  $d_b=5$  mm, and  $h=6$  mm

**Supplementary Video S2:** PTFE ball bouncing status with  $f=10$  Hz,  $A=3$  mm,  $d_b=5$  mm, and  $h=8$  mm

**Supplementary Video S3:** PTFE ball bouncing status with  $f=30$  Hz,  $A=0.5$  mm,  $d_b=5$  mm, and  $h=6$  mm

**Supplementary Video S4:** PTFE ball bouncing status with  $f=15$  Hz,  $A=3$  mm,  $d_b=5$  mm, and  $h=8$  mm

**Supplementary Video S5:** PTFE ball bouncing status with  $f=30$  Hz,  $A=0.5$  mm,  $d_b=5$  mm, and  $h=10$  mm

**Supplementary Video S6:** 30 LEDs lit up by the BB-TENG sensor
