# Supplementary material for: A Self-Powered and Highly Accurate Vibration Sensor Based on Bouncing-Ball Triboelectric Nanogenerator for Intelligent Ship Machinery Monitoring
Source: Micromachines (Basel). 2021 Feb 21;12(2):218. doi: 10.3390/mi12020218 (PMC7927136; doi:10.3390/mi12020218)
Supplement: Supplementary file 1 [file micromachines-12-00218-s001.zip]

Archive with 8 entries (7 files):
- micromachines-1104735-supplementary/
- micromachines-1104735-supplementary/Supporting information-final version .pdf
- micromachines-1104735-supplementary/Video S1 PTFE ball bouncing status at f=25Hz, A=0.5mm, db=5mm, and h=6mm.mp4
- micromachines-1104735-supplementary/Video S2 PTFE ball bouncing status at f=10Hz, A=3mm, db=5mm, and h=8mm.mp4
- micromachines-1104735-supplementary/Video S3 PTFE ball bouncing status at f=30Hz, A=0.5mm, db=5mm, and h=6mm.mp4
- micromachines-1104735-supplementary/Video S4 PTFE ball bouncing status at f=15Hz, A=3mm, db=5mm, and h=8mm.mp4
- micromachines-1104735-supplementary/Video S5 PTFE ball bouncing status at f=30Hz, A=0.5mm, db=5mm, and h=10mm.mp4
- micromachines-1104735-supplementary/Video S6 30 LEDs lit up by the BB-TENG sensor.mp4
